# Supplementary material for: PDX1LOW MAFALOW β-cells contribute to islet function and insulin release
Source: PubMed Central journal article supplement (PMC7846747; doi:10.1038/s41467-020-20632-z), 2021-01-29
Supplement: 41467_2020_20632_MOESM1_ESM.pdf [file 41467_2020_20632_MOESM1_ESM.pdf]

## SUPPLEMENTARY INFORMATION

### PDX1<sup>LOW</sup> MAFA<sup>LOW</sup> $\beta$ -cells contribute to islet function and insulin release

Daniela Nasteska<sup>1-3</sup>, Nicholas H.F. Fine<sup>1-3</sup>, Fiona B. Ashford<sup>1-3</sup>, Federica Cuzzo<sup>1-3</sup>, Katrina Vilorio<sup>1-3</sup>, Gabrielle Smith<sup>1,3</sup>, Aisha Dahir<sup>1,3</sup>, Peter W.J. Dawson<sup>4,5</sup>, Yu-Chiang Lai<sup>1,4,5</sup>, Aimée Bastidas-Ponce<sup>6-9</sup>, Mostafa Bakhti<sup>6-8</sup>, Guy A. Rutter<sup>10,11</sup>, Remi Fiancette<sup>12</sup>, Rita Nano<sup>13,14</sup>, Lorenzo Piemonti<sup>13,14</sup>, Heiko Lickert<sup>6-9</sup>, Qiao Zhou<sup>15</sup>, Ildem Akerman<sup>1,3</sup>, David J. Hodson<sup>1-3\*</sup>

<sup>1</sup>Institute of Metabolism and Systems Research (IMSR), University of Birmingham, Birmingham, UK

<sup>2</sup>Centre of Membrane Proteins and Receptors (COMPARE), University of Birmingham and University of Nottingham, Midlands, UK.

<sup>3</sup>Centre for Endocrinology, Diabetes and Metabolism, Birmingham Health Partners, Birmingham, UK

<sup>4</sup>School of Sport, Exercise and Rehabilitation Science, University of Birmingham, UK

<sup>5</sup>MRC-Versus Arthritis Centre for Musculoskeletal Ageing Research, University of Birmingham, Edgbaston, UK

<sup>6</sup>Institute of Diabetes and Regeneration Research, Helmholtz Zentrum München, D-85764 Neuherberg, Germany

<sup>7</sup>German Center for Diabetes Research (DZD), D-85764 Neuherberg, Germany

<sup>8</sup>Institute of Stem Cell Research, Helmholtz Zentrum München, D-85764 Neuherberg, Germany

<sup>9</sup>Technical University of Munich, School of Medicine, Munich, Germany

<sup>10</sup>Section of Cell Biology and Functional Genomics, Division of Diabetes, Endocrinology, and Metabolism, Department of Metabolism, Reproduction, and Digestion, Imperial College London, London, UK

<sup>11</sup>Lee Kong Chian School of Medicine, Nanyang Technological University, Singapore

<sup>12</sup>Institute of Immunology & Immunotherapy, College of Medical and Dental Sciences, University of Birmingham, B15 2TT, Birmingham, UK

<sup>13</sup>San Raffaele Diabetes Research Institute, IRCCS Ospedale San Raffaele, Italy

<sup>14</sup>Vita-Salute San Raffaele University, Milan, Italy

<sup>15</sup>Division of Regenerative Medicine, Department of Medicine, Weill Cornell Medical College, New York, USA

\*Corresponding author: David J. Hodson, [d.hodson@bham.ac.uk](mailto:d.hodson@bham.ac.uk)

42 **SUPPLEMENTARY FIGURES**

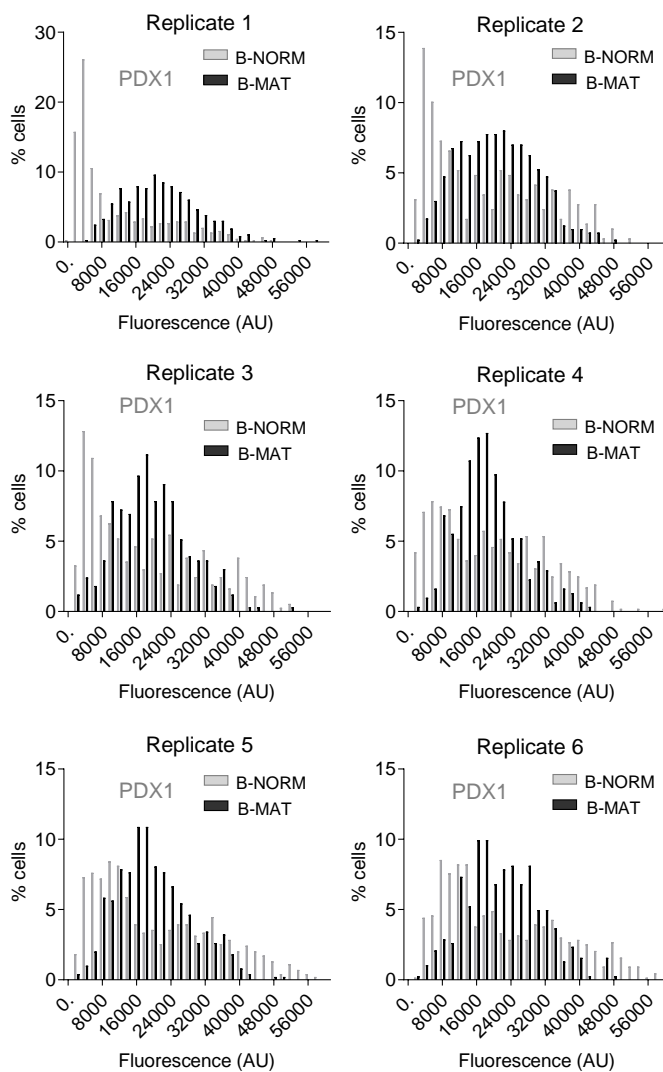

43

44 **Supplementary Figure 1: PDX1 fluorescence intensity distribution plots.** PDX1  
45 fluorescence intensity distribution plots shown by individual replicate (n = 6).

46

47

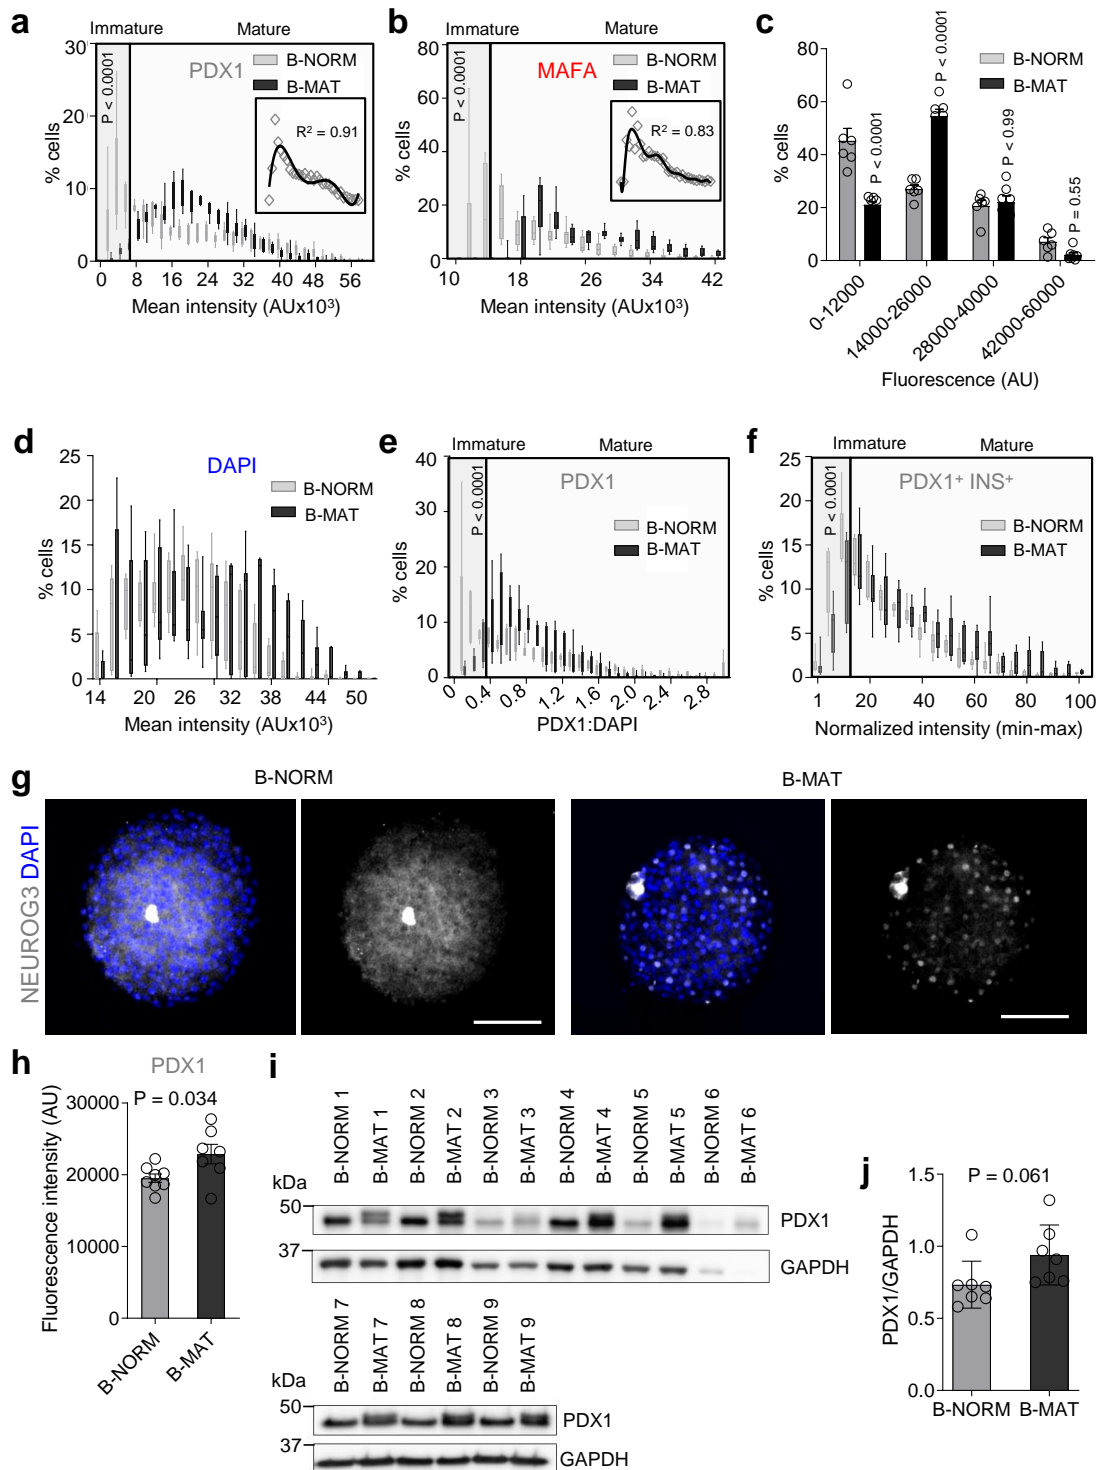

48

49 **Supplementary Figure 2: Raw data and normalization controls for mouse B-MAT**  
 50 **islets, NEUROG3 expression and overexpression strength.** **a, b** Non-normalized PDX1  
 51 **(a)** and MAFA **(b)** fluorescence intensity-probability distribution showing a decrease in the  
 52 proportion of cells occupying the bottom 15 percentile for PDX1 and MAFA expression in B-  
 53 MAT versus B-NORM islets (n = 6 islets/3 animals; two-way ANOVA, Bonferroni's multiple  
 54 comparison) (PDX1: F = 13.38, DF = 30) (MAFA: F = 3.98, DF = 32). **c**, As for **a**, but wider  
 55 bins showing no changes in the proportion of cells occupying the higher fluorescence  
 56 intensity ranges in B-MAT versus B-NORM islets (n = 6 islets/3 animals; two-way ANOVA,  
 57 Bonferroni's multiple comparison)) (F = 43.25, DF = 3). **d** DAPI nuclear staining intensity  
 58 distribution is similar in normal ( $\beta$ -cell normal; B-NORM) and Ad-M3C-transduced ( $\beta$ -cell

59 mature; B-MAT) islets (n = 6 islets/3 animals; two-way ANOVA). **e** Loss of immature  $\beta$ -cells  
60 is still evident in B-MAT islets following normalization of PDX1 expression levels versus  
61 DAPI for each cell analyzed (n = 6 islets/3 animals; two-way ANOVA) (F = 4.9, DF = 30). **f**  
62 As for **e**, but taking into account only cells that are positive for both insulin (INS) and PDX1  
63 (n = 6 islets/3 animals; two-way ANOVA) (F = 4.1, DF = 20). **g** NEUROG3 cannot be  
64 detected in normal B-NORM islets using specific antiserum, but is faintly present in B-MAT  
65 islets (scale bar = 85  $\mu$ m). **h** Whole-islet PDX1 fluorescence intensity is only slightly  
66 increased in B-MAT versus B-NORM islets (n = 7 islets/3 animals; unpaired t-test). **i** Western  
67 blot showing PDX1 and GAPDH expression (run in parallel on separate blots) in B-NORM  
68 and B-MAT islets (n = 9 animals, labelled 1 through 9; samples 1 -6 and 7-9 were run on  
69 separate gels processed in parallel). A slight shift in the PDX1 band in B-MAT islets is  
70 apparent due to the presence of exogenous PDX1. **j** Densitometric quantification of the blots  
71 shown in (i) (n = 8 animals, labelled 1-5 and 7-9). Note that B-NORM 6 and B-MAT 6 were  
72 omitted from analysis due to poor abundance (i.e. GAPDH was undetectable). Bar graphs  
73 show the mean  $\pm$  SEM. Box-and-whiskers plot shows median and min-max. All tests are  
74 two-sided where relevant.

75

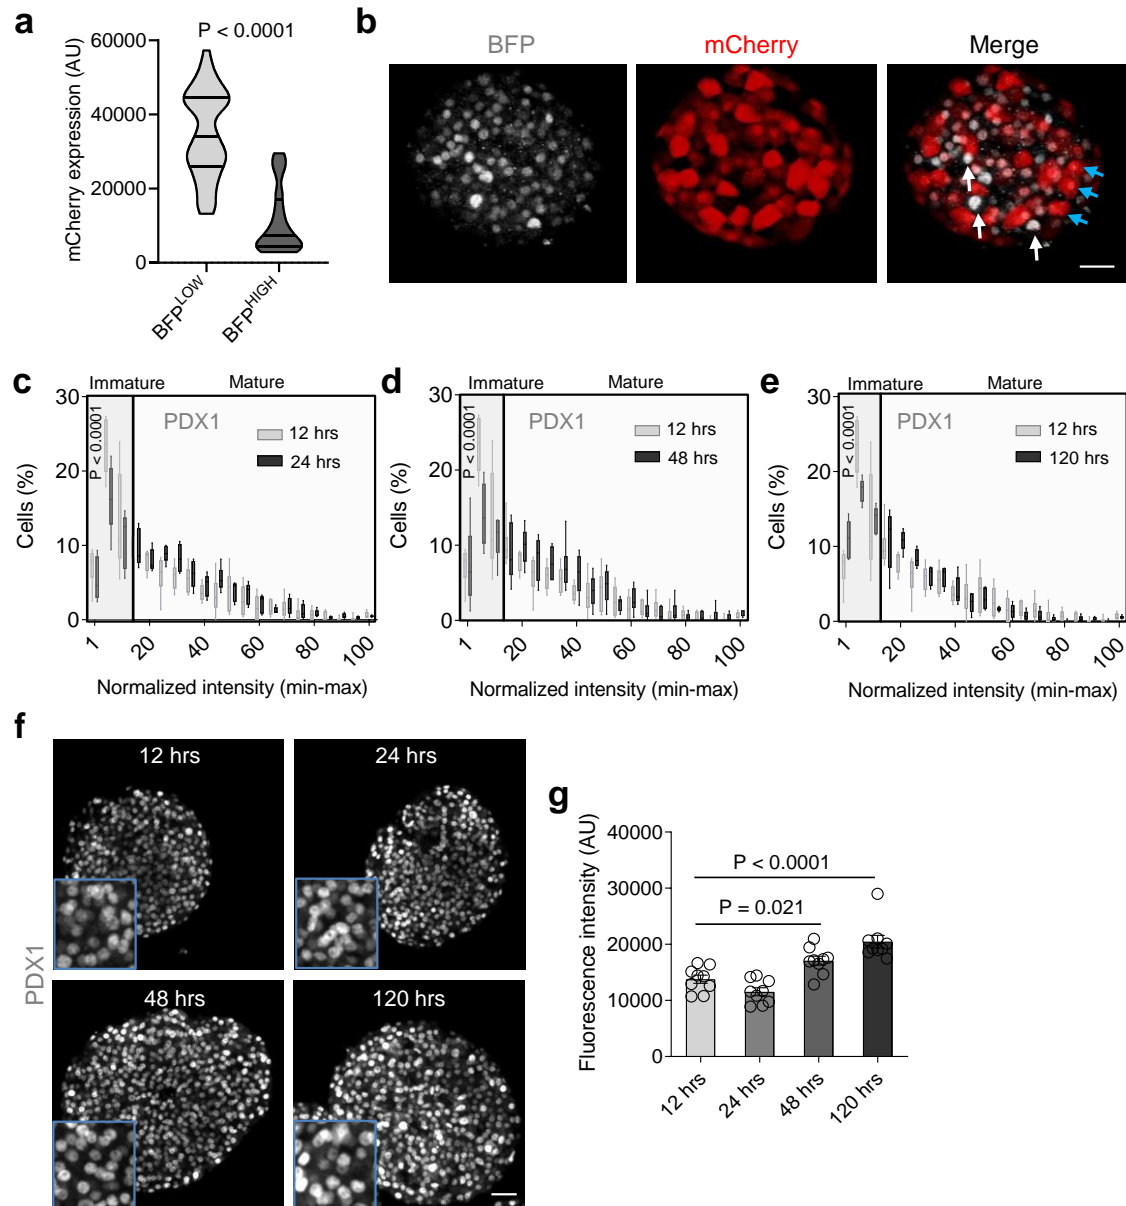

76

77

78 **Supplementary Figure 3: Overexpression localization and time course studies for Ad-**  
 79 **M3C.** **a** mCherry expression and thus Ad-M3C viral transduction is significantly higher in  
 80 BFP<sup>LOW</sup> cells (i.e. immature) (n = 48 cells from 7 islets) (unpaired t-test). **b** Representative  
 81 images showing mCherry expression in Pdx1-BFP islets 48 hours following infection with  
 82 Ad-M3C. White arrows show BFP/PDX1<sup>HIGH</sup> cells with low mCherry levels, whereas blue  
 83 arrows show BFP/PDX1<sup>LOW</sup> cells with high mCherry levels (scale bar = 26.5 μm). **c-e** The  
 84 proportion of β-cells occupying the bottom 15 percentile for PDX1 expression (PDX1<sup>LOW</sup>) is  
 85 reduced in islets transduced with Ad-M3C at 24 hrs post-infection (**c**), and this change is  
 86 sustained at 48 hrs (**d**) and 120 hrs (**e**) post-infection (n = 6 islets/3 animals; two-way  
 87 ANOVA, Bonferroni's multiple correction) (24 hrs: F = 3.01, DF = 20) (48 hrs: F = 2.24, DF =  
 88 20) (120 hrs: F = 4.9, DF = 20). Note that the same 12 hrs (control) PDX1 fluorescence  
 89 intensity distribution is shown in all graphs to allow cross-comparison (the experiments were  
 90 performed in parallel). **f** Representative images showing PDX1 staining at 12-120 hrs post-  
 91 infection (scale bar = 25 μm). **g** An increase in PDX1 fluorescence is apparent after 48 hrs,  
 92 as overexpression continues to increase in the targeted cells (n = 9 islets/3 animals; one-

93 way ANOVA, Sidak's multiple correction) ( $F = 20.83$ ,  $DF = 3$ ). Bar graphs show the mean  $\pm$   
94 SEM. Violin plot shows median and interquartile range. Box-and-whiskers plot shows  
95 median and min-max. All tests are two-sided where relevant.

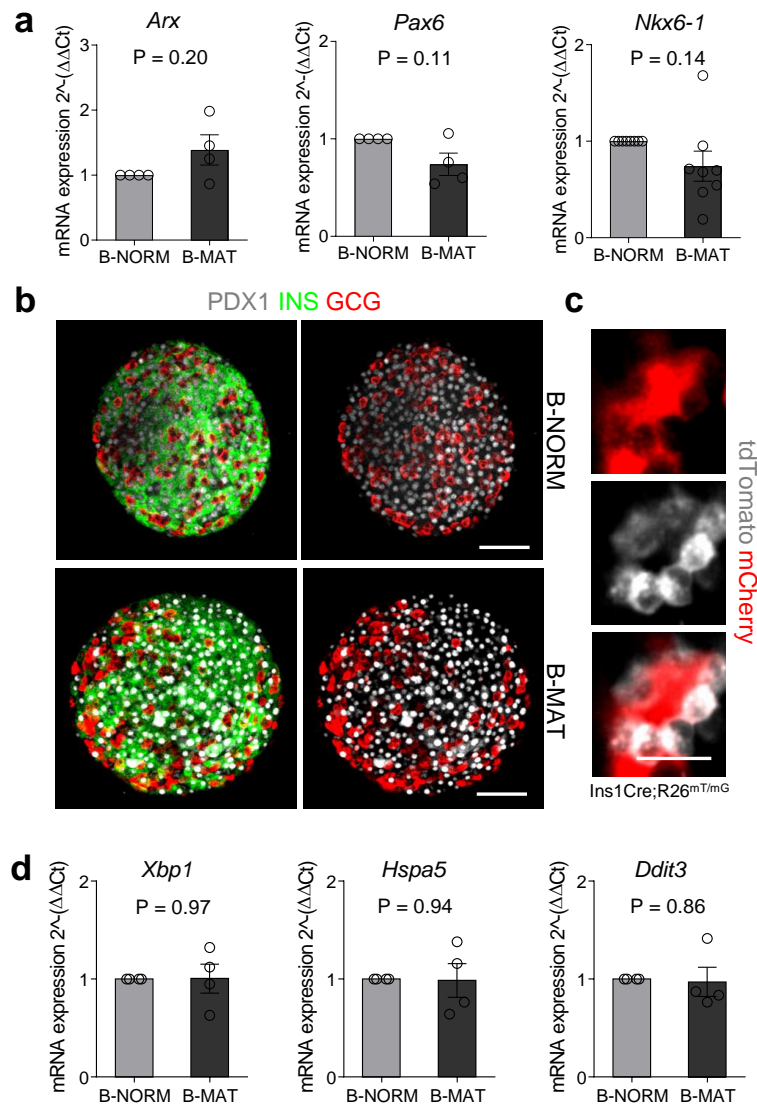

96  
 97  
 98  
 99  
 100  
 101  
 102  
 103  
 104  
 105  
 106  
 107  
 108

**Supplementary Figure 4: Overexpression is largely confined to  $\beta$ -cells and ER stress markers are not upregulated.** **a** Expression levels of *Arx*, *Pax6* and *Nkx6-1* are not significantly altered in B-MAT islets (n = 4 animals; paired t-test). **b** No difference in the proportion of PDX1<sup>+</sup>GCG<sup>+</sup> cells was detected in B-NORM compared to B-MAT islets (scale bar = 120  $\mu$ m). **c** Imaging of live Ins1Cre;R26<sup>mT/mG</sup> reporter islets was used to preserve mCherry expression for assessment of localization. No mCherry expression was detected in non-  $\beta$ -cells (tdTomato; grey) at the viral titres used here (n = 17 islets/2 animals) (scale bar = 25  $\mu$ m). **d** Expression of the ER stress/UPR markers *Xbp1*, *Hspa5* and *Ddit3* is not significantly altered in B-MAT islets (n = 4 animals; paired t-test). Bar graphs show the mean  $\pm$  SEM. All tests are two-sided where relevant. ER-endoplasmic reticulum; UPR-unfolded protein response.

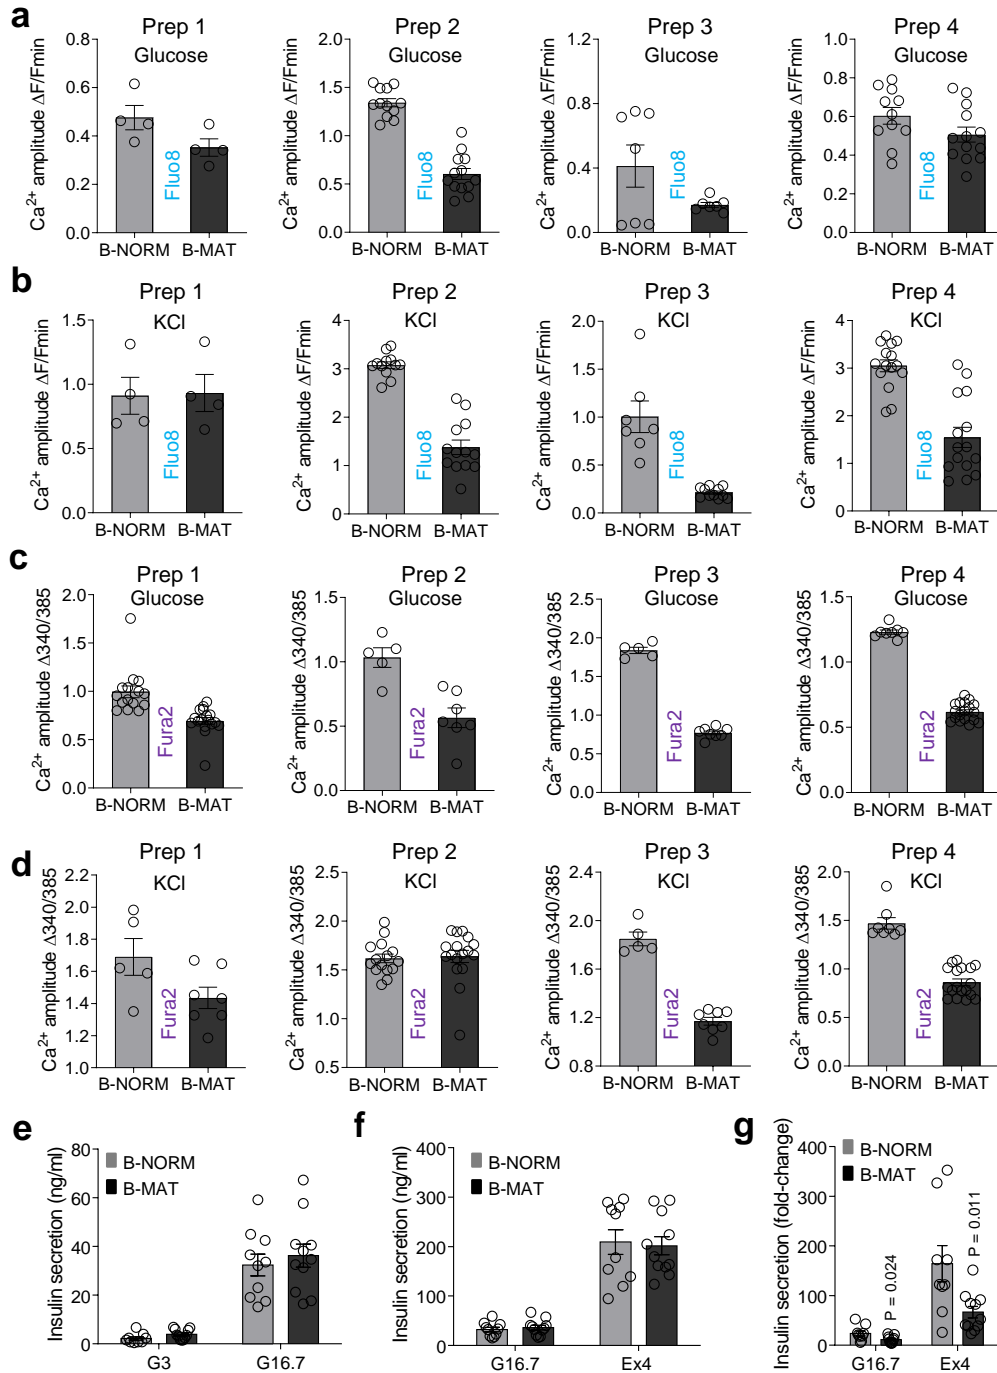

109

110 **Supplementary Figure 5:  $\text{Ca}^{2+}$  recordings shown by individual preparation, raw insulin**  
 111 **secretion data and fold-change insulin release. a, b** Summary bar graphs showing  
 112 amplitude of  $\text{Ca}^{2+}$  responses to glucose (a) or KCl (b) for each separate islet  
 113 isolation/preparation, measured using Fluo8 (n = 34 islets/4 preparations/4-5 animals). c, d  
 114 Summary bar graphs showing amplitude of  $\text{Ca}^{2+}$  responses to glucose (c) or KCl (d)  
 115 for each separate islet isolation/preparation, measured using Fura2 (n = 33 islets/4 preparations/4  
 116 animals). e Uncorrected basal and glucose-stimulated insulin secretion in B-NORM and B-  
 117 MAT islets (n = 8 replicates/4 animals). f As for e, but raw Exendin-4-stimulated insulin  
 118 secretion (n = 8 replicates/4 animals). g As for e and f, but fold-change glucose- and  
 119 Exendin-4-stimulated insulin secretion in B-NORM and B-MAT islets (n = 8 replicates/4  
 120 animals; paired t-test). Note that all samples were run together with the same low glucose  
 121 control, but due to the relative magnitude, Exendin-4 responses are displayed separately



122 with the same high glucose state (G3, 3 mM glucose; G16.7, 16.7 mM glucose; Ex4, 20 nM  
123 Exendin-4). Bar graphs show the mean  $\pm$  SEM. All tests are two-sided where relevant.

124

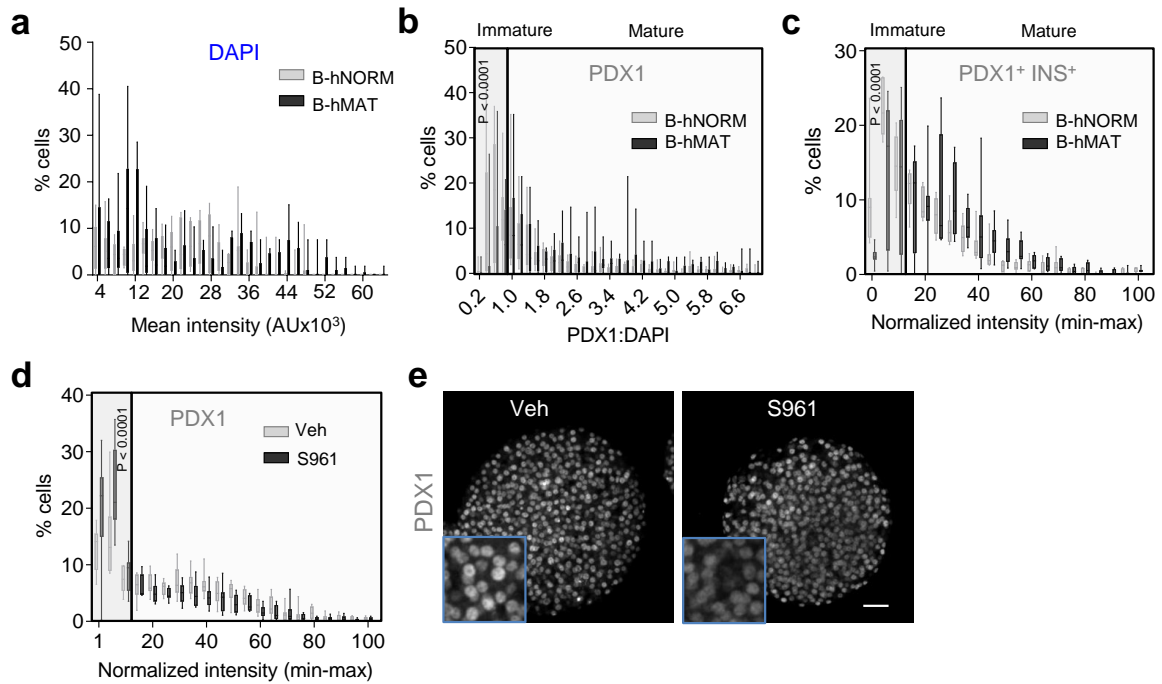

125

126

127 **Supplementary Figure 6: Normalization controls for B-hMAT islets, and insulin**

128 **receptor antagonist experiments.** **a** DAPI nuclear staining intensity distribution is similar

129 in normal ( $\beta$ -cell normal; B-hNORM) and Ad-M3C-transduced ( $\beta$ -cell mature; B-hMAT)

130 human islets ( $n = 14$  islets/4 donors; two-way ANOVA). **b** Loss of immature PDX<sup>LOW</sup>  $\beta$ -cells

131 is still evident in B-hMAT islets following normalization of PDX1 expression levels versus

132 DAPI for each cell analyzed ( $n = 13$  islets/4 donors; two-way ANOVA, Bonferroni's multiple

133 comparison) ( $F = 2.32$ ,  $DF = 34$ ). **c** As for **b**, but taking into account only cells that are

134 positive for both insulin (INS) and PDX1 ( $n = 8$  islets; two-way ANOVA, Bonferroni's multiple

135 comparison) ( $F = 6.15$ ,  $DF = 20$ ). **d**, **e** Treatment with the insulin receptor antagonist, S961

136 50 nM, increases the proportion of immature PDX1<sup>LOW</sup>  $\beta$ -cells in wild-type islets versus

137 vehicle (Veh)-treated controls, as shown by frequency distribution (**d**) ( $F = 3.97$ ,  $DF = 20$ )

138 and representative images (**e**) (scale bar = 25  $\mu$ m) ( $n = 8$  islets/3 animals; two-way ANOVA,

139 Bonferroni's multiple comparison). Box-and-whiskers plot shows median and min-max. All

139 tests are two-sided where relevant.

140

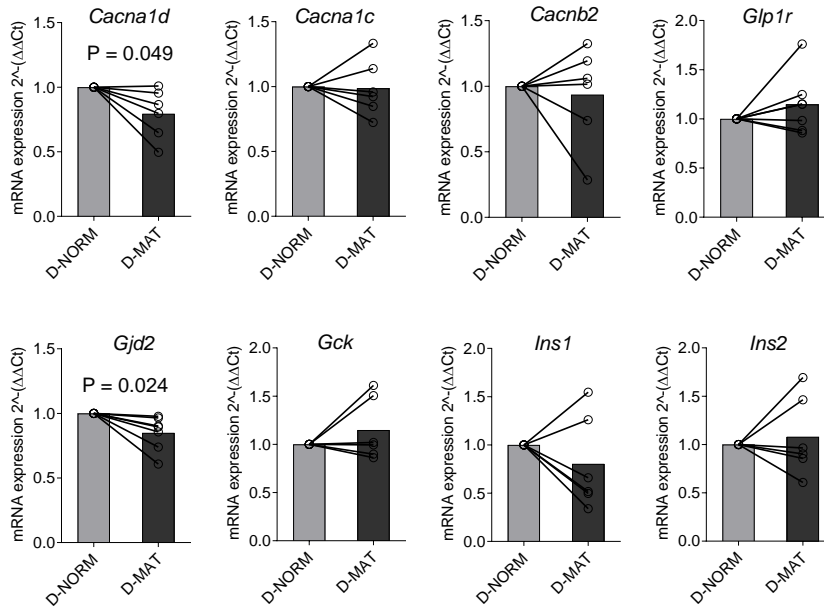

141

142 **Supplementary Figure 7: Gene expression analyses in D-NORM and D-MAT islets.**  
 143 mRNA levels for *Cacna1d*, *Cacna1c*, *Cacnb2*, *Glp1r*, *Gjd2*, *Gck*, *Ins1* and *Ins2* in D-NORM  
 144 versus D-MAT chemogenetic islets (n = 6 animals; paired t-test). Bar graphs show paired  
 145 observations (before and after). All tests are two-sided where relevant.

146

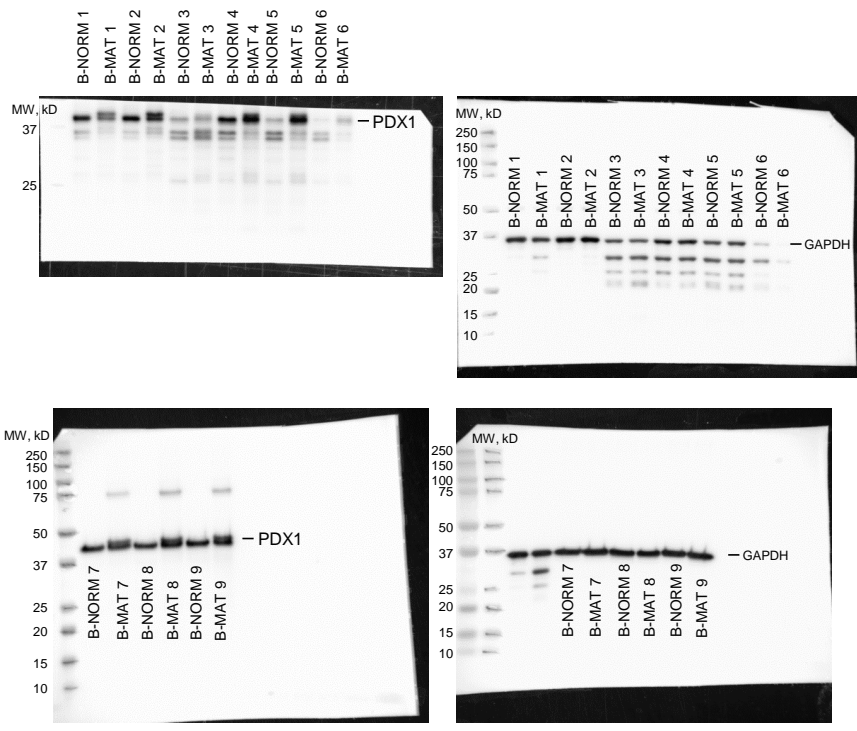

147

148 **Supplementary Figure 8: Full blot scans corresponding to Supplementary Figure 2i.**

149

150 **SUPPLEMENTARY TABLES**

| Unique Identifier | Age group (years) | Gender | BMI (kg/m <sup>2</sup> ) | Glycemia (mmol/L)*<br>HbA1C (%) | History of diabetes ** | Islet purity (%) | Islet culture duration (h) | Country of origin |
|-------------------|-------------------|--------|--------------------------|---------------------------------|------------------------|------------------|----------------------------|-------------------|
| HP1267            | 50-55             | ♂      | 26.5                     | 6.4 mmol/L                      | No                     | 90               | 16                         | Italy             |
| HP1300            | 20-25             | ♂      | 23.5                     | 5.6 mmol/L                      | No                     | 70               | 18                         | Italy             |
| HP1301            | 60-65             | ♀      | 29                       | 11.6 mmol/L                     | No                     | 80               | 14                         | Italy             |
| HP1306            | 45-50             | ♂      | 27.7                     | 6.8 mmol/L                      | No                     | 80               | 18                         | Italy             |
| HP1319            | 60-65             | ♂      | 23.1                     | 5.2 mmol/L                      | No                     | 90               | 42                         | Italy             |
| HP1325            | 60-65             | ♀      | 23.9                     | 6.1 mmol/L                      | No                     | 60               | 19                         | Italy             |
| HP1331            | 60-65             | ♀      | 19.5                     | 7.1 mmol/L                      | No                     | 90               | 16                         | Italy             |
| HP1332            | 60-65             | ♀      | 29.3                     | 6.1 mmol/L                      | No                     | 90               | 14                         | Italy             |
| HP1356            | 50-55             | ♀      | 19.3                     | 7.1 mmol/L                      | No                     | 80               | 16                         | Italy             |
| HP1365            | 60-65             | ♀      | 27.7                     | 9.3 mmol/L                      | No                     | 70               | 65                         | Italy             |
| HP1373            | 65-70             | ♀      | 21.5                     | 7.1 mmol/L                      | No                     | 65               | 18                         | Italy             |
| R277              | 45-50             | ♂      | 33.7                     | 5.6%                            | No                     | 75               | 114                        | Canada            |
| R278              | 55-60             | ♂      | 27.6                     | 5.7%                            | No                     | 80               | 17                         | Canada            |
| R292              | 45-50             | ♂      | 27.6                     | 5.6%                            | No                     | 90               | 17                         | Canada            |
| R330              | 35-40             | ♀      | 24.2                     | 5.1 %                           | No                     | 85               | 33                         | Canada            |
| R340              | 35-40             | ♂      | 23.3                     | 5.3%                            | No                     | 95               | 16                         | Canada            |
| R341              | 40-45             | ♂      | 30                       | n/a                             | No                     | 95               | 34                         | Canada            |
| R344              | 55-60             | ♂      | 27.8                     | 5.5%                            | No                     | 95               | 42                         | Canada            |

151

152 **Supplementary Table 1:** Human islet donor characteristics. \*: glycemia values during  
 153 Intensive Care Unit stay \*\*: not diagnosed ante-mortem; ♂-male; ♀-female; n/a-not  
 154 available; ages are reported as a range in line with the journal indirect identifier policy.

155

| <b>Primers</b>            |       |                                                                 |
|---------------------------|-------|-----------------------------------------------------------------|
| <b>SYBR Green primers</b> |       |                                                                 |
| <i>β-actin</i>            | Sigma | For: CGAGTCGCGTCCACCC<br>Rev: CATCCATGGCGAACTGGTG               |
| <i>Pdx1-native</i>        | Sigma | For: ACTTAACCTAGGCGTCGCACAAGA<br>Rev: GGCATCAGAAGCAGCCTCAAAGTT  |
| <i>Pdx1-viral</i>         | Sigma | For: TGCCTTCGGGCCTTAGCGT<br>Rev: CCGGGATTCTCCTCCACGT            |
| <i>MafA-native</i>        | Sigma | For: CGGGAACGGTGATTGCTTAG<br>Rev: GGAGGTTGGGACGCAGAA            |
| <i>MafA-viral</i>         | Sigma | For: TTCCCTCGGGAGCCCTCG<br>Rev: TCTCAACATCTCCAGCCAA             |
| <i>Neurog3-native</i>     | Sigma | For: AGGTGATCTGCCTTCTTCTGCACT<br>Rev: ACCGTCCCTGCAACTCACACTTTA  |
| <i>Neurog3-viral</i>      | Sigma | For: GCTCCCATCCTATCTGC<br>Rev: TCTTCAACATCTCCTGCTT              |
| <i>Gck</i>                | Sigma | For: AGCTGCACCCGAGCTTCA<br>Rev: GATTCGCGAGTTGGGTGTCA            |
| <i>Arx</i>                | Sigma | For: TTCCAGAAGACGCACTACCC<br>Rev: TCTGTCAGGTCCAGCCTCAT'         |
| <i>Pax6</i>               | Sigma | For: CAGTGTCTACCAGCCAATCC<br>Rev: GCACTGTACGTGTTGGTGAG          |
| <i>Nkx 61</i>             | Sigma | For: GCCTGTACCCCCATCAAG<br>Rev: GTGGGTCTGGTGTGTTTTCTCTT         |
| <i>Cacna1c</i>            | Sigma | For: CCAACCTCATCCTCTTCTTCA<br>Rev: ACATAGTCTGCATTGCCTAGGAT      |
| <i>Cacna1d</i>            | Sigma | For: GAAGCTGCTTGACCAAGTTGT<br>Rev: AACTTCCCACGGTTACCTC          |
| <i>Cacnb2</i>             | Sigma | For: GCAGGAGAGCCAGATGGA<br>Rev: TCCTGGCTCCTTTCCATAG             |
| <i>Rfx6</i>               | Sigma | For: TGCCAGTGCATACTCGACAAT<br>Rev: AACAGGATTTTCAAGCAGGGG        |
| <i>Xbp1</i>               | Sigma | For: AGCAGCAAGTGGTGGATTTG<br>Rev: GAGTTTTCTCCCGTAAAAGCTGA       |
| <i>Hspa5</i>              | Sigma | For: ACTTGGGGACCACCTATTCTT<br>Rev: GTTGCCCTGATCGTTGGCTA         |
| <i>Ddit3</i>              | Sigma | For: CTGGAAGCCTGGTATGAGGAT<br>Rev: CAGGGTCAAGAGTAGTGAAGGT       |
| <i>Glp1r</i>              | Sigma | For:<br>GGGTCTCTGGCTACATAAGGACAAC<br>Rev: AAGGATGGCTGAAGCGATGAC |
| <i>Adcy8</i>              | Sigma | For: TTGGGCTTCTACACCTTGACT<br>Rev: CGGTAGCTGTATCCTCCATTGAG      |
| <i>Gjd2</i>               | Sigma | For: GATTGGGAGGATCCTGTTGAC<br>Rev: AGGGCTAGGAAGACAGTAGAG        |
| <i>Ins1</i>               | Sigma | For: GTCGGTGGGCATCCAGTAA<br>Rev: AATGACCTGCTTGCTGATGGT          |
| <i>Ins2</i>               | Sigma | For: GAAGTGGAGGACCCACAAGT<br>Rev: GATCTACAATGCCACGCTTC          |
| <i>Cox6a2</i>             | Sigma | For: GCCCAGCAAGATTCTGTGATG<br>Rev: TCTGGATGTGCGGTAAGGCAT        |
| <i>G6pc2</i>              | Sigma | For: ACTCCACAGAAAGGACCAGG<br>Rev: GTCATGGTAACAGCTGCCCT          |
| <i>Ascl1</i>              | Sigma | For: TCGTTGGCGAGAAACACTAA<br>Rev: AGGAACAAGAGCTGCTGGAC          |
| <i>Ero1LB</i>             | Sigma | For: TGCTGTCAATGTCACATAAGC<br>Rev: AACTGCTTGTACCCTGAGC          |
| <i>Pkib</i>               | Sigma | For: CTGCTCCCTTAACTGCTGGAT                                      |

|                       |                   |                                                            |
|-----------------------|-------------------|------------------------------------------------------------|
|                       |                   | Rev: GATTGTGGAAAAGCGTGTGGT                                 |
| <i>Rgs4</i>           | Sigma             | For: GAGTGCAAAGGACATGAAACATC<br>Rev: TTTTCCAACGATTCAGCCCAT |
| <i>Ucn3</i>           | Sigma             | For: AAGCCTCTCCACAAGTTCTA<br>Rev: GAGGTGCGTTTGGTTGTCATC    |
| <i>Stx1a</i>          | Sigma             | For: AAGATTGCCGAAAACGTGGAG<br>Rev: TGCTCAATGCTCTTTAGCTTGG  |
| <i>Snap25</i>         | Sigma             | For: CAACTGGAACGCATTGAGGAA<br>Rev: GGCCACTACTCCATCCTGATTAT |
| <i>Vamp2</i>          | Sigma             | For: GCTGGATGACCGTGCAGAT<br>Rev: GATGGCGCAGATCACTCCC       |
| <i>PPIA</i>           | Sigma             | For: AAGACTGAGTGGTTGGATGG<br>Rev: ATGGTGATCTTCTTGCTGGT     |
| <i>GJD2</i>           | Sigma             | For: ATCGGGAGGATCCTGTTGAC<br>Rev: GAGTAGGTGATGAAGCAAAGACTG |
| <i>PDX1</i>           | Sigma             | For: TGCTAGAGCTGGAGAAGGAG<br>Rev: TTGATGTGTCTCTCGGTCAA     |
| <i>CACNA1G</i>        | Sigma             | For: GCTTCGGAACCGATGCTTC<br>Rev: TCCTCGTTCTCTGTCTGGTAAT    |
| <i>CACNA1H</i>        | Sigma             | For: TCTTCTTCTGCCTCGGTCA<br>Rev: CACGCAGTTGAGCATGATT       |
| <i>CACNA1I</i>        | Sigma             | For: GGAGCTGATCCTCATGTCCC<br>Rev: CACGGGTTGCACACCATCT      |
| <i>CACNA1A</i>        | Sigma             | For: GATTTTAGCCACCATCATAGCGA<br>Rev: CCAGCCGTTCCAGACATCGG  |
| <i>CACNA1C</i>        | Sigma             | For: TCCAGAAGATGATTCCAACG<br>Rev: ATTGGGGTGAAAGAGGAGTC     |
| <i>CACNA1D</i>        | Sigma             | For: CGCGAACGAGGCAAACATATG<br>Rev: TTGGAGCTATTCGGCTGAGAA   |
| <i>CACNA1A</i>        | Sigma             | For: GATTTTAGCCACCATCATAGCGA<br>Rev: CCAGCCGTTCCAGACATCGG  |
| <i>SCN1B</i>          | Sigma             | For: GTCTACCGCTGCTCTTCTTC<br>Rev: TGGATGCCATGTCTCTGTTG     |
| <i>SCN3A</i>          | Sigma             | For: TTCACTAATGCCTGGTGCTG<br>Rev: CCGAGTTCTGAGTAGCCAAGAG   |
| <i>SCN3B</i>          | Sigma             | For: ATTGTTTCCCCTGGCTTCTC<br>Rev: AGGGCACTTCCACACACAC      |
| <i>SCN8A</i>          | Sigma             | For: AGCACCATCCTATGACACCAC<br>Rev: TGGCTATGAGCTTCAGGAAC    |
| <i>SCN9A</i>          | Sigma             | For: TCATCTTTGGGTCATTCTTCAC<br>Rev: ACCCCAGCTTTTTTCATTGC   |
| <b>TaqMan™ probes</b> |                   |                                                            |
| <i>Gapdh</i>          | Fisher Scientific | Mm99999915_g1                                              |
| <i>Gjd2</i>           | Fisher Scientific | Mm00439121_m1                                              |
| <i>PPIA</i>           | Fisher Scientific | Hs03045993_gH                                              |
| <i>MAFA</i>           | Fisher Scientific | Hs04419862_g1                                              |
| <i>NEUROG3</i>        | Fisher Scientific | Hs00360700_g1                                              |

156

157 **Supplementary Table 2:** Primer sequences and probe IDs.
